# Supplementary material for: Olive and grape seed extract prevents post-traumatic osteoarthritis damages and exhibits in vitro anti IL-1β activities before and after oral consumption
Source: PubMed Central journal article supplement (PMC5027597; doi:10.1038/srep33527), 2016-09-19
Supplement: srep33527-s1.pdf [file srep33527-s1.pdf]

**Olive and grape seed extract prevents post-traumatic osteoarthritis damages and exhibits in vitro anti IL-1 $\beta$  activities before and after oral consumption**

**E. Mével, C. Merceron, C. Vinatier, S. Krisa, T. Richard, M. Masson, J. Lesoeur, V. Hivernaud, O. Gauthier, J. Abadie, G. Nourissat, X. Houard, Y. Wittrant, N. Urban, L. Beck, J. Guicheux**

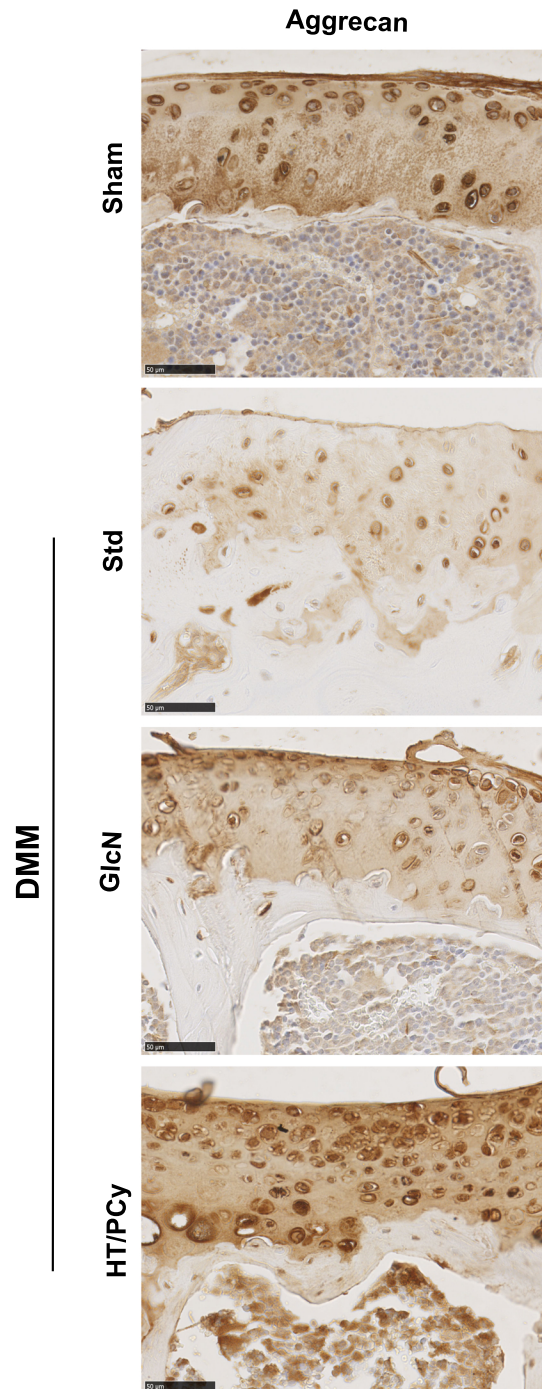

**Supplementary Figure 1:**

**Mice (n=6 per group) underwent sham surgery or DMM bilaterally. Mice received regular diet (Sham and Std groups) or diet supplemented with GlcN, HT/PCy for 12 weeks starting 4 weeks before surgery. Immunohistochemical staining (brown signal) using antibody directed against aggrecan in sham or DMM mice receiving diet supplementation with GlcN, HT/PCy. Bar represents 50 $\mu$ m.**

**Olive and grape seed extract prevents post-traumatic osteoarthritis damages and exhibits in vitro anti IL-1 $\beta$  activities before and after oral consumption**

**E. Mével, C. Merceron, C. Vinatier, S. Krisa, T. Richard, M. Masson, J. Lesoeur, V. Hivernaud, O. Gauthier, J. Abadie, G. Nourissat, X. Houard, Y. Wittrant, N. Urban, L. Beck, J. Guicheux**

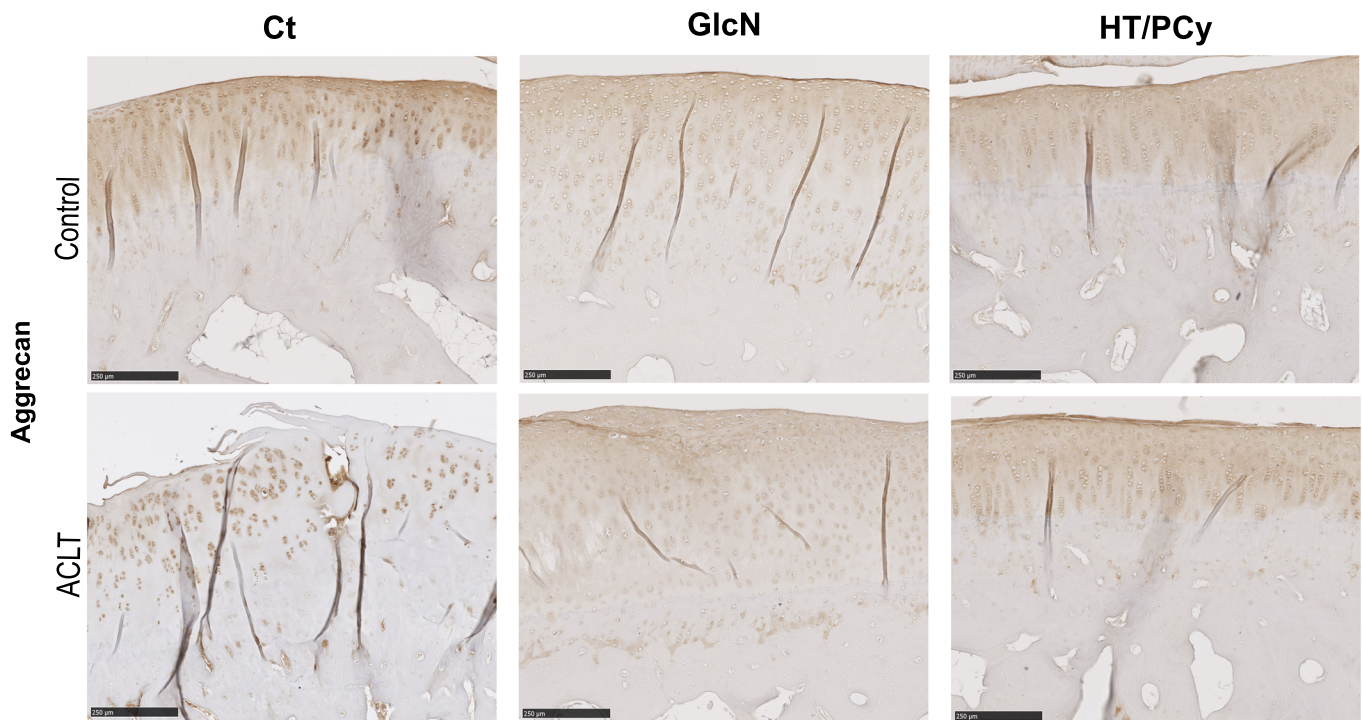

**Supplementary Figure 2:**

**Rabbits (n=6 per group) underwent ACLT of the right knee. NaCl (Std), GlcN or HT/PCy were orally administrated every two days for 13 weeks starting 3 weeks before surgery. Immunohistochemical detection of aggrecan of the articular cartilage matrix of standard diet (Std), GlcN and HT/PCy diet groups at 10 weeks after ACLT. Bar represents 250 $\mu$ m.**

*Olive and grape seed extract prevents post-traumatic osteoarthritis damages and exhibits in vitro anti IL-1 $\beta$  activities before and after oral consumption*

*E. Mével, C. Merceron, C. Vinatier, S. Krisa, T. Richard, M. Masson, J. Lesoeur, V. Hivernaud, O. Gauthier, J. Abadie, G. Nourissat, X. Houard, Y. Wittrant, N. Urban, L. Beck, J. Guicheux*

| Scoring category            | Observation                                                  | Score     |
|-----------------------------|--------------------------------------------------------------|-----------|
| Chondrocytes death          | None                                                         | 0         |
|                             | 0-10%                                                        | 1         |
|                             | 10-25%                                                       | 2         |
|                             | 25-50%                                                       | 3         |
|                             | 50-75%                                                       | 4         |
|                             | 75-100%                                                      | 5         |
| Hypertrophy                 | None                                                         | 0         |
|                             | Presence                                                     | 1         |
| Clusters                    | None                                                         | 0         |
|                             | Superficial zone                                             | 1         |
|                             | Middle zone                                                  | 2         |
|                             | Complexe structures                                          | 3         |
|                             | Mild layer cyst formation                                    | 4         |
| Loss of Safranin-O staining | None                                                         | 0         |
|                             | Superficial zone of non-calcified cartilage                  | 1         |
|                             | Middle zone of non-calcified cartilage                       | 2         |
|                             | Non-calcified cartilage and intense staining around clusters | 3         |
|                             | Total with staining around clusters                          | 4         |
|                             | Total                                                        | 5         |
| Surface                     | Intact                                                       | 0         |
|                             | Superficial fibrillation or abrasion                         | 1         |
|                             | Deep fibrillation                                            | 2         |
|                             | Vertical fissures                                            | 3         |
|                             | Delamination/ excavation                                     | 4         |
| Bone                        | None                                                         | 0         |
|                             | Denudation                                                   | 4         |
|                             | Microfracture                                                | 5         |
|                             | Remodeling                                                   | 6         |
|                             | <b>Total</b>                                                 | <b>25</b> |

**Supplementary Table 1: The OARSI scoring system used to evaluate OA severity adapted from Glasson, S.S., *et al.*, 2010 and Pritzker, K.P., *et al.*, 2005.**

*Olive and grape seed extract prevents post-traumatic osteoarthritis damages and exhibits in vitro anti IL-1 $\beta$  activities before and after oral consumption*

*E. Mével, C. Merceron, C. Vinatier, S. Krisa, T. Richard, M. Masson, J. Lesoeur, V. Hivernaud, O. Gauthier, J. Abadie, G. Nourissat, X. Houard, Y. Wittrant, N. Urban, L. Beck, J. Guicheux*

|                               | Scoring category                                         | Observation       | Score |
|-------------------------------|----------------------------------------------------------|-------------------|-------|
|                               | Menisci calcification                                    | None              | 0     |
|                               |                                                          | 1                 | 1     |
|                               |                                                          | 2                 | 2     |
| Number of visible osteophytes | Medial tibial condyle                                    | None              | 0     |
|                               |                                                          | Low - Moderate    | 1     |
|                               |                                                          | Moderate - Severe | 2     |
|                               | Medial femoral condyle                                   | None              | 0     |
|                               |                                                          | Low - Moderate    | 1     |
|                               |                                                          | Moderate - Severe | 2     |
| Medial fabella                | Absence                                                  | 0                 |       |
|                               | Presence                                                 | 1                 |       |
|                               | Structural modifications of subchondral bone (sclerosis) | None              | 0     |
|                               |                                                          | Low - Moderate    | 1     |
|                               |                                                          | Moderate - High   | 2     |
|                               | Width of the joint space                                 | Normal            | 0     |
|                               |                                                          | Reduced           | 1     |
|                               |                                                          | Absent            | 2     |
|                               | Calcification of tendons and ligaments                   | None              | 0     |
|                               |                                                          | 1 site            | 1     |
|                               |                                                          | > 1 site          | 2     |
|                               |                                                          | Total             | 13    |

**Supplementary Table 2: The radiographic scoring system used to evaluate OA severity inspired by Kellgren, J.H. and J.S. Lawrence, 1957 and Boulocher C.B., *et al.*, 2010.**

*Olive and grape seed extract prevents post-traumatic osteoarthritis damages and exhibits in vitro anti IL-1 $\beta$  activities before and after oral consumption*

*E. Mével, C. Merceron, C. Vinatier, S. Krisa, T. Richard, M. Masson, J. Lesoeur, V. Hivernaud, O. Gauthier, J. Abadie, G. Nourissat, X. Houard, Y. Wittrant, N. Urban, L. Beck, J. Guicheux*

| Species | Amplified gene | Primer sequences (5'-3')                                 | Gene Bank Reference | Amplicon Size (bp) |
|---------|----------------|----------------------------------------------------------|---------------------|--------------------|
| Rabbit  | iNOS           | FP : TGACGTCCAGCGCTACAATA<br>RP : TCGGTCTCCAGTCCCATC     | NM_000625.4         | 60                 |
|         | COX2           | FP : GGAAGCGCTCTACGGCGACA<br>RP : CCCCAAAGATGGCATCCGGGC  | NM_001082388.1      | 86                 |
|         | MMP13          | FP : TTTTGAAGACACGGGCAAG<br>RP : TCATCATAGCTCCAGACTTGGTT | NM_002427.2         | 60                 |
|         | ACTB           | FP : CCCATCTACGAGGGCTACGC<br>RP : TCCTTGATGTCCCGCACGATC  | NM_001101683.1      | 152                |

**Supplementary Table 3: Amplified gene, sequences of primers and gene bank accession reference used for real-time PCR analysis and size of PCR products.** iNOS : inducible nitric oxide synthase ; COX2 : cyclo-oxygenase; MMP-13: matrix metalloproteinase 13; ACTB:  $\beta$ -actin; FP: forward primer; RP: reverse primer.
